# Supplementary material
Source: publisher figshare collection journal article supplement (https://karger.figshare.com/ndownloader/files/17035130)
Supplement: Supplementary file 1 [file 17035130]

| Homo sapiens BCR, RhoGEF and GTPase activating protein (BCR), transcript variant 1, mRNA (NCBI Reference Sequence: NM_004327.3) | |
| --- | --- |
| (a)  1 ggggggaggg tggcggctcg atgggggagc cgcctccagg gggccccccc gccctgtgcc  61 cacggcgcgg cccctttaag aggcccgcct ggctccgtca tccgcgccgc ggccacctcc  121 ccccggccct ccccttcctg cggcgcagag tgcgggccgg gcgggagtgc ggcgagagcc  181 ggctggctga gcttagcgtc cgaggaggcg gcggcggcgg cggcggcacg gcggcggcgg  241 ggctgtgggg cggtgcggaa gcgagaggcg aggagcgcgc gggccgtggc cagagtctgg  301 cggcggcctg gcggagcgga gagcagcgcc cgcgcctcgc cgtgcggagg agccccgcac  361 acaatagcgg cgcgcgcagc ccgcgccctt ccccccggcg cgccccgccc cgcgcgccga  421 gcgccccgct ccgcctcacc tgccaccagg gagtgggcgg gcattgttcg ccgccgccgc  481 cgccgcgcgg gccatggggg ccgcccggcg cccggggccg ggctggcgag gcgccgcgcc  541 gccgctgaga cgggccccgc gcgcagcccg gcggcgcagg taaggccggc cgcgccatgg  601 tggacccggt gggcttcgcg gaggcgtgga aggcgcagtt cccggactca gagcccccgc  661 gcatggagct gcgctcagtg ggcgacatcg agcaggagct ggagcgctgc aaggcctcca  721 ttcggcgcct ggagcaggag gtgaaccagg agcgcttccg catgatctac ctgcagacgt  781 tgctggccaa ggaaaagaag agctatgacc ggcagcgatg gggcttccgg cgcgcggcgc  841 aggcccccga cggcgcctcc gagccccgag cgtccgcgtc gcgcccgcag ccagcgcccg  901 ccgacggagc cgacccgccg cccgccgagg agcccgaggc ccggcccgac ggcgagggtt  961 ctccgggtaa ggccaggccc gggaccgccc gcaggcccgg ggcagccgcg tcgggggaac  1021 gggacgaccg gggacccccc gccagcgtgg cggcgctcag gtccaacttc gagcggatcc  1081 gcaagggcca tggccagccc ggggcggacg ccgagaagcc cttctacgtg aacgtcgagt  1141 ttcaccacga gcgcggcctg gtgaaggtca acgacaaaga ggtgtcggac cgcatcagct  1201 ccctgggcag ccaggccatg cagatggagc gcaaaaagtc ccagcacggc gcgggctcga  1261 gcgtggggga tgcatccagg cccccttacc ggggacgctc ctcggagagc agctgcggcg  1321 tcgacggcga ctacgaggac gccgagttga acccccgctt cctgaaggac aacctgatcg  1381 acgccaatgg cggtagcagg cccccttggc cgcccctgga gtaccagccc taccagagca  1441 tctacgtcgg gggcatgatg gaaggggagg gcaagggccc gctcctgcgc agccagagca  1501 cctctgagca ggagaagcgc cttacctggc cccgcaggtc ctactccccc cggagttttg  1561 aggattgcgg aggcggctat accccggact gcagctccaa tgagaacctc acctccagcg  1621 aggaggactt ctcctctggc cagtccagcc gcgtgtcccc aagccccacc acctaccgca  1681 tgttccggga caaaagccgc tctccctcgc agaactcgca acagtccttc gacagcagca  1741 gtccccccac gccgcagtgc cataagcggc accggcactg cccggttgtc gtgtccgagg  1801 ccaccatcgt gggcgtccgc aagaccgggc agatctggcc caacgatggc gagggcgcct  1861 tccatggaga cgcagatggc tcgttcggaa caccacctgg atacggctgc gctgcagacc  1921 gggcagagga gcagcgccgg caccaagatg ggctgcccta cattgatgac tcgccctcct  1981 catcgcccca cctcagcagc aagggcaggg gcagccggga tgcgctggtc tcgggagccc  2041 tggagtccac taaagcgagt gagctggact tggaaaaggg cttggagatg agaaaatggg  2101 tcctgtcggg aatcctggct agcgaggaga cttacctgag ccacctggag gcactgctgc  2161 tgcccatgaa gcctttgaaa gccgctgcca ccacctctca gccggtgctg acgagtcagc  2221 agatcgagac catcttcttc aaagtgcctg agctctacga gatccacaag gagttctatg  2281 atgggctctt cccccgcgtg cagcagtgga gccaccagca gcgggtgggc gacctcttcc  2341 agaagctggc cagccagctg ggtgtgtacc gggccttcgt ggacaactac ggagttgcca  2401 tggaaatggc tgagaagtgc tgtcaggcca atgctcagtt tgcagaaatc tccgagaacc  2461 tgagagccag aagcaacaaa gatgccaagg atccaacgac caagaactct ctggaaactc  2521 tgctctacaa gcctgtggac cgtgtgacga ggagcacgct ggtcctccat gacttgctga  2581 agcacactcc tgccagccac cctgaccacc ccttgctgca ggacgccctc cgcatctcac  2641 agaacttcct gtccagcatc aatgaggaga tcacaccccg acggcagtcc atgacggtga  2701 agaagggaga gcaccggcag ctgctgaagg acagcttcat ggtggagctg gtggaggggg  2761 cccgcaagct gcgccacgtc ttcctgttca ccgacctgct tctctgcacc aagctcaaga  2821 agcagagcgg aggcaaaacg cagcagtatg actgcaaatg gtacattccg ctcacggatc  2881 tcagcttcca gatggtggat gaactggagg cagtgcccaa catccccctg gtgcccgatg  2941 aggagctgga cgctttgaag atcaagatct cccagatcaa gaatgacatc cagagagaga  3001 agagggcgaa caagggcagc aaggctacgg agaggctgaa gaagaagctg tcggagcagg  3061 agtcactgct gctgcttatg tctcccagca tggccttcag ggtgcacagc cgcaacggca  3121 agagttacac gttcctgatc tcctctgact atgagcgtgc agagtggagg gagaacatcc  **Bose (1) *3121** agagttacac gttcctgatc tcctctgact at**gagcgtgc agagtggagg gagaaca**tcc  **Ravetto (1) *3121** agagttacac gttcctgatc tcctctgact atgagcgtgc agagtggagg gagaacatc**c**  **Song (1.2) *3121** agagttacac gttcctgatc tcctctgact at**gagcgtgc** **agagtggagg gagaacatcc**  3181 gggagcagca gaagaagtgt ttcagaagct tctccctgac atccgtggag ctgcagatgc  **Bieurnaux (1) *3181** gggagcagca **gaagaagtgt ttcagaagct tctccc**tgac atccgtggag ctgcagatgc  **Bose (2) *3181** gggagcagca gaagaagtgt **ttcagaagct tctccctgac** **at**ccgtggag ctgcagatgc  **Ravetto (1) *3181** **gggagcagca gaagaagtg*t*** ttcagaagct tctccctgac atccgtggag ctgcagatgc  **Hsu (1) *3181** gggagcagca gaagaa**g*tg*t ttcagaagct tctc*cct***gac atccgtggag ctgcagatgc  **Hsu (2) *3181** gggagcagca gaagaagtgt ttcagaagct tctccctgac atccgtggag ctg**cagatgc**  **le Coutre (1) *3181** gggagcagca gaagaagtgt **ttcaga*~~agc~~*t tctccctg*ac*** **atccgt**ggag ctgcagatgc  **Song (1.1) *3181** gggagcagca gaa**gaagtgt ttcagaagct** **tctcc**ctgac atccgtggag ctgcagatgc  **Song (1.2) *3181** **gg**gagcagca gaagaagtgt ttcagaagct tctccctgac atccgtggag ctgcagatgc  **Song (2.1) *3181** gggagcagca gaagaagtgt ttcagaagct tctccctgac atccg***t*ggag ctgcagatgc**  **Song (2.2) *3181** gggagcagca **gaagaagtgt ttcagaagct tctcc**ctgac atccgtggag ctgcagatgc  **Boquett (1) *3181** gggagcagca gaagaagtgt **ttcagaagct tctccctg**ac atccgtggag ctgcagatgc  **Boquett (2) *3181** gggagcagca gaagaagtgt **ttcagaagct tctccctgac atccg**tggag ctgcagatgc  3241 tgaccaactc gtgtgtgaaa ctccagactg tccacagcat tccgctgacc atcaa**t**aagg  **Bieurnaux (2) *3241** tgaccaactc gtgtg**tgaaa ctccagactg tccacagcat** tccgctgacc atcaataagg  **Ravetto (2) *3241** tgaccaactc gtgt**gtgaaa** **ctccagactg tccacagca**t tccgctgacc atcaataagg  **Hsu (2) *3241** **tgaccaactc** **gtgt**gtgaaa ctccagactg tccacagcat tccgctgacc atcaataagg  **le Coutre (2) *3241** tgaccaactc gtgtgtgaaa ctccagact**g** **tccacagcat tccgctgacc atcaat**aagg  **Song (2.1) *3241** **tgaccaactc** gtgtgtgaaa ctccagactg tccacagcat tccgctgacc atcaataagg  **Ismail (1) *3241** tgaccaactc gtgtgtgaaa ctccagactg tcc**acag*c*at tc*~~c~~*gctgacc atcaataag**g  **Ismail (2) *3241** tgaccaactc gtgtgtgaaa ctccagactg tccacagcat tccg**ctgacc atcaataagg**  3301 aagatgatga gtctccgggg ctct**a**tgggt ttctgaatgt catcgtccac tcagccactg  **Ismail (2) *3301** **aag**atgatga gtctccgggg ctctatgggt ttctgaatgt catcgtccac tcagccactg  3361 gatttaagca gagttcaaat ctgtactgca ccctggaggt ggattccttt gggtattttg  3421 tgaataaagc aaagacgcgc gtctacaggg acacagctga gccaaactgg aacgaggaat  3481 ttgagataga gctggagggc tcccagaccc tgaggatact gtgctatgaa aagtgttaca  3541 acaagacgaa gatccccaag gaggacggcg agagcacgga cagactcatg gggaagggcc  3601 aggtccagct ggacccgcag gccctgcagg acagagactg gcagcgcacc gtcatcgcca  3661 tgaatgggat cgaagtaaag ctctcggtca agttcaacag cagggagttc agcttgaaga  3721 ggatgccgtc ccgaaaacag acaggggtct tcggagtcaa gattgctgtg gtcaccaaga  3781 gagagaggtc caaggtgccc tacatcgtgc gccagtgcgt ggaggagatc gagcgccgag  3841 gcatggagga ggtgggcatc taccgcgtgt ccggtgtggc cacggacatc caggcactga  3901 aggcagcctt cgacgtcaat aacaaggacg tgtcggtgat gatgagcgag atggacgtga  3961 acgccatcgc aggcacgctg aagctgtact tccgtgagct gcccgagccc ctcttcactg  4021 acgagttcta ccccaacttc gcagagggca tcgctctttc agacccggtt gcaaaggaga  4081 gctgcatgct caacctgctg ctgtccctgc cggaggccaa cctgctcacc ttccttttcc  4141 ttctggacca cctgaaaagg gtggcagaga aggaggcagt caataagatg tccctgcaca  4201 acctcgccac ggtctttggc cccacgctgc tccggccctc cgagaaggag agcaagctcc  4261 ctgccaaccc cagccagcct atcaccatga ctgacagctg gtccttggag gtcatgtccc  4321 aggtccaggt gctgctgtac ttcctgcagc tggaggccat ccctgccccg gacagcaaga  4381 gacagagcat cctgttctcc accgaagtct aaaggtccca gtccatctcc tggaggcgga  4441 cagatggcct ggaaacctct ggctaatcgg gccatccgta gagcgggaac cttcctgagg  4501 tgtccttggg ccacccccaa gtgttgggcc atctgccaag agacagcgac ccaaagccga  4561 aggacaggtg gcctggaaag atcccgccca ggtctgggag ccccaggctg gcctcagact  4621 gtggtttttt atgtggccac ctgagggcgc cccaagccag ttcatctcgg agtccaggcc  4681 tggccctggg agacagggtg aagggagtgg tttttatgaa cttaacttag agtctaaaag  4741 atttctactg gatcacttgt caagatgcgc cctctctggg gagaagggaa cgtgactgga  4801 ttccctcact gttgtatctt gaataaacgc tgctgcttca tcctgtgggg gccgtggccc  4861 tgtccctgtg tgggtggggc ctcttccatt tccctgactt agaaaccaca ctccacttct  4921 aacagggttt gagaggctta gtcagcactg ggtagcgttt tgactccatt cttggctttc  4981 tttttctttc cagaaggatt tttgtgcaga aatgggtctt ttgttgccat gttagtcctc  5041 cttggaaggc agctcagaag gcctgtgaaa tgtcagggga caggaccccc agggagggaa  5101 ccccaggcta cgcactttag ggttcgttct ccagggagag cgacctcgtc ccccgatcct  5161 gaccgccctt ccggcccacg ctctcctgtt tggcttccac aggcctggac ttctctggct  5221 tctctgccca cacactccct gcccccagtg tccctgcccc tgccccagca caggtgactt  5281 catttctgtc ctctcagctc agtggactcg ctcaactttt gtataagtct ccacttggtg  5341 gcagcagctt gctgatgact tgttttaaaa ctttcatcct aaataacctt ttgatacttg  5401 aatatttgta agttttatac atagtttcta atttttttcc gaacagatcc agatacctaa  5461 taagatgctg gaatgtaatc cctggacaat ccgtgtcctg gcagcatttg gtcttcctct  5521 aagcgcctgg ctccgctgtt ctcaggagtg ggttctgaag tctctggaga acaggatacg  5581 tggagggtta ggaaggggcc aggcctagag acgggagact ccctcccgga gcaggtggag  5641 gcacaggacc attcgctacc ccatctgccg acacctgcgg gggagcccag gcattctttg  5701 taaaccctcc tgaccacctg gctcaaagaa aacagaagca tggagaccgc caagtatttt  5761 caagaaataa ccccatgaat attccatcac ttttttagaa agaggggctt ggggcaggca  5821 gaggagagaa gggagagcaa actgagagcc aagtttccac acggtcctgc aggaggagag  5881 gatgcagctg cccagaggga agcaggatca catttaagga agtgtgtggg gtccctggat  5941 gacaccagca cccagtgcgg ctctgtctgg cacccgctcc caaggtggga ggagtgggtg  6001 tcccctgtgt gtcagtgggc agctcctgct gaacccgcag ctcactaggg agcctgacag  6061 tggggccatg cgcctgacac tcctctctgc ttgtggacct ggcaaggcag ggagcagaaa  6121 acagccactt gaaggctttc tgtctgcgtc tgtgtgcagt gtggatttag ttgtgctttt  6181 ttcttgctgg gagagcacag ccaccattta caagcagtgt caccgtcgtg ggtggcgagg  6241 acagaacagg agcctctgct ctctgtacct atctgggccc ggtgggctcc cttgtcctgg  6301 cttccatctc tgtctcagcg accattcagc cctgcgcagg aacacgtgtt gcttagaaaa  6361 gccaaatcca gccttgtctc tgcctcctct ggtctcatga tgtgcatctg ttaccttgaa  6421 actggaaacc agtctatcaa tgtctgtgcc aattttttat tccctcccca acctccttcc  6481 ccatacgact ttttatttat gtaggatgtg tgctgtctaa tgatgggatg accacacttt  6541 tccatgttct aaaagtgctc ctctcccgca gggtcccagg gctggtggtt gctttgggtc  6601 tacagctacg tcttacccac ctcctgcctc aacagcctgt gtggtggcaa agccggtgtg  6661 gggctgggga acgcagcgtt ctccaggagg gggacctggc tctccttctg caatgcaggc  6721 gaaggcctag atgccagtgt gacctcccac aaggcgtggc ttccagactc cccggccgga  6781 agtgatgctt ttttgccttg ggccctgggt ttgaagcagc ctggctttct cttggtaagt  6841 ggctggtgtc ttagcagctg caatctgagc tcagccacct acacaccacc gtggccgaca  6901 ctttcattaa aaagtttcct gagacga | (b)  1 ggggggaggg tggcggctcg atgggggagc cgcctccagg gggccccccc gccctgtgcc  61 cacggcgcgg cccctttaag aggcccgcct ggctccgtca tccgcgccgc ggccacctcc  121 ccccggccct ccccttcctg cggcgcagag tgcgggccgg gcgggagtgc ggcgagagcc  181 ggctggctga gcttagcgtc cgaggaggcg gcggcggcgg cggcggcacg gcggcggcgg  241 ggctgtgggg cggtgcggaa gcgagaggcg aggagcgcgc gggccgtggc cagagtctgg  301 cggcggcctg gcggagcgga gagcagcgcc cgcgcctcgc cgtgcggagg agccccgcac  361 acaatagcgg cgcgcgcagc ccgcgccctt ccccccggcg cgccccgccc cgcgcgccga  421 gcgccccgct ccgcctcacc tgccaccagg gagtgggcgg gcattgttcg ccgccgccgc  481 cgccgcgcgg gccatggggg ccgcccggcg cccggggccg ggctggcgag gcgccgcgcc  541 gccgctgaga cgggccccgc gcgcagcccg gcggcgcagg taaggccggc cgcgccatgg  601 tggacccggt gggcttcgcg gaggcgtgga aggcgcagtt cccggactca gagcccccgc  661 gcatggagct gcgctcagtg ggcgacatcg agcaggagct ggagcgctgc aaggcctcca  721 ttcggcgcct ggagcaggag gtgaaccagg agcgcttccg catgatctac ctgcagacgt  781 tgctggccaa ggaaaagaag agctatgacc ggcagcgatg gggcttccgg cgcgcggcgc  841 aggcccccga cggcgcctcc gagccccgag cgtccgcgtc gcgcccgcag ccagcgcccg  901 ccgacggagc cgacccgccg cccgccgagg agcccgaggc ccggcccgac ggcgagggtt  961 ctccgggtaa ggccaggccc gggaccgccc gcaggcccgg ggcagccgcg tcgggggaac  1021 gggacgaccg gggacccccc gccagcgtgg cggcgctcag gtccaacttc gagcggat**c**c  1081 gcaagggcca tggccagccc ggggcggacg ccgagaagcc cttctacgtg aacgtcgagt  1141 ttcaccacga gcgcggcctg gtgaaggtca acgacaaaga ggtgtcggac cgcatcagct  1201 ccctgggcag ccaggccatg cagatggagc gcaaaaagtc ccagcacggc gcgggctcga  1261 gcgtggggga tgcatccagg cccccttacc ggggacgctc ctcggagagc agctgcggcg  1321 tcgacggcga ctacgaggac gccgagttga acccccgctt cctgaaggac aacctgatcg  1381 acgccaatgg cggtagcagg cccccttggc cgcccctgga gtaccagccc taccagagca  1441 tctacgtcgg gggcatgatg gaaggggagg gcaagggccc gctcctgcgc agccagagca  1501 cctctgagca ggagaagcgc cttacctggc cccgcaggtc ctactccccc cggagttttg  **Bose (1) *1501** cctctgagca ggagaagcgc cttacctggc cccgcaggtc ctact**ccccc cggagttttg**  1561 aggattgcgg aggcggctat accccggact gcagctccaa tgagaacctc acctccagcg  **Bose (1) *1561** **aggattgc**gg aggcggctat accccggact gcagctccaa tgagaacctc acctccagcg  1621 aggaggactt ctcctctggc cagtccagcc gcgtgtcccc aagccccacc acctaccgca  **Ismail (1) *1621** aggaggactt ctcctctggc cagtccagcc gcgtgtcccc aagccccacc acct**accgca**  1681 tgttccggga caaaagccgc tctccctcgc agaactcgca acagtccttc gacagcagca  **Ismail (1) *1681** **tgttccggga caaaag**ccgc tctccctcgc agaactcgca acagtccttc gacagcagca  **Bose (2) *1681** tgttccggga caaaagccgc tctccctcgc a**gaactcgca acagtccttc gac**agcagca  1741 gtccccccac gccgcagtgc cataagcggc accggcactg cccggttgtc gtgtccgagg  **Uckun (1) *1741** gtccccccac gccgcagtgc cataagcggc accggcactg cccggttgtc gtg**tccgagg**  **Ravetto (1) *1741** gtccccccac gccgcagtgc cataagcggc accggcactg cccgg**ttgtc** **gtgtccgagg**  1801 ccaccatcgt gggcgtccgc aagaccgggc agatctggcc caacgatggc gagggcgcct  **Uckun (1) *1801** **ccaccatcgt gggcgtc*c*gc** aagaccgggc agatctggcc caacgatggc gagggcgcct  **Uckun (2) *1801** ccaccatcgt gggcgtccgc aagaccgggc agatctggc**c caacgatggc** **gagggcgcct**  **Ravetto (1) *1801 ccacc**atcgt gggcgtccgc aagaccgggc agatctggcc caacgatggc gagggcgcct  **Ravetto (2) *1801** ccaccatcgt gggcgtccg**c aagaccgggc** **agatctggcc** **c**aacgatggc gagggcgcct  **Song (1.1) *1801** cc**accat*c*gt** **gggcgtccgc** **aaga**ccgggc agatctggcc caacgatggc gagggcgcct  **Song (1.2) *1801** ccaccatcgt gggcgtccgc aagaccgggc agatctggcc caacg**atggc** **gagggcgcct**  **Song (2) *1801** ccaccatcgt gggcgtccgc aagaccgggc agatctggcc caacg**atggc** **gagggcgcct**  **Kosik *1801** ccaccatcgt gggcgtccgc aagaccgggc agat**ctggcc** **caacgatggc** **ga**gggcgcct  1861 tccatggaga cgcagatggc tcgtt**c**ggaa caccacctgg atacggctgc gctgcagacc  **Song (1.2) *1861 tccat**ggaga cgcagatggc tcgttcggaa caccacctgg atacggctgc gctgcagacc  **Song (2) *1861 tccat**ggaga cgcagatggc tcgttcggaa caccacctgg atacggctgc gctgcagacc  **Ismail (2) *1861** tcc**atggaga** **cgcaga*t*g**gc tcgttcggaa caccacctgg atacggctgc gctgcagacc  1921 gggcagagga gcagcgccgg caccaagatg ggctgcccta cattgatgac tggccctcct  1981 catcgcccca cctcagcagc aagggcaggg gcagccggga tgc**g**ctggtc tcgggagccc  2041 tggagtccac taaagcgagt gagctggact tggaaaaggg cttggagatg agaaaatggg  2101 tcctgtcggg aatcctggct agcgaggaga cttacctgag ccacctggag gcactgctgc  2161 tgcccatgaa gcctttgaaa gccgctgcca ccacctctca gccggtgctg acgagtcagc  2221 agatcgagac catcttcttc aaagtgcctg agctctacga gatccacaag gagttctatg  2281 atgggctctt cccccgcgtg cagcagtgga gccaccagca gcgggtgggc gacctcttcc  2341 agaagctggc cagccagctg ggtgtgtacc gggccttcgt ggacaactac ggagttgcca  2401 tggaaatggc tgagaagtgc tgtcaggcca atgctcagtt tgcagaaatc tccgagaacc  2461 tgagagccag aagcaacaaa gatgccaagg atccaacgac caagaactct ctggaaactc  2521 tgctctacaa gcctgtggac cgtgtgacga ggagcacgct ggtcctccat gacttgctga  2581 agcacactcc tgccagccac cctgaccacc ccttgctgca ggacgccctc cgcatctcac  2641 agaacttcct gtccagcatc aatgaggaga tcacaccccg acggcagtcc atgacggtga  2701 agaagggaga gcaccggcag ctgctgaagg acagcttcat ggtggagctg gtggaggggg  2761 cccgcaagct gcgccacgtc ttcctgttca ccgacctgct tctctgcacc aagctcaaga  2821 agcagagcgg aggcaaaacg cagcagtatg actgcaaatg gtacattccg ctcacggatc  2881 tcagcttcca gatggtggat gaactggagg cagtgcccaa catccccctg gtgcccgatg  2941 aggagctgga cgctttgaag atcaagatct cccagatcaa gaatgacatc cagagagaga  3001 agagggcgaa caagggcagc aaggctacgg agaggctgaa gaagaagctg tcggagcagg  3061 agtcactgct gctgcttatg tctcccagca tggccttcag ggtgcacagc cgcaacggca  3121 agagttacac gttcctgatc tcctctgact atgagcgtgc agagtggagg gagaacatcc  3181 gggagcagca gaagaagtgt ttcagaagct tctccctgac atccgtggag ctgcagatgc  3241 tgaccaactc gtgtgtgaaa ctccagactg tccacagcat tccgctgacc atcaataagg  3301 aagatgatga gtctccgggg ctctatgggt ttctgaatgt catcgtccac tcagccactg  3361 gatttaagca gagttcaaat ctgtactgca ccctggaggt ggattccttt gggtattttg  3421 tgaataaagc aaagacgcgc gtctacaggg acacagctga gccaaactgg aacgaggaat  3481 ttgagataga gctggagggc tcccagaccc tgaggatact gtgctatgaa aagtgttaca  3541 acaagacgaa gatccccaag gaggacggcg agagcacgga cagactcatg gggaagggcc  3601 aggtccagct ggacccgcag gccctgcagg acagagactg gcagcgcacc gtcatcgcca  3661 tgaatgggat cgaagtaaag ctctcggtca agttcaacag cagggagttc agcttgaaga  3721 ggatgccgtc ccgaaaacag acaggggtct tcggagtcaa gattgctgtg gtcaccaaga  3781 gagagaggtc caaggtgccc tacatcgtgc gccagtgcgt ggaggagatc gagcgccgag  3841 gcatggagga ggtgggcatc taccgcgtgt ccggtgtggc cacggacatc caggcactga  3901 aggcagcctt cgacgtcaat aacaaggacg tgtcggtgat gatgagcgag atggacgtga  3961 acgccatcgc aggcacgctg aagctgtact tccgtgagct gcccgagccc ctcttcactg  4021 acgagttcta ccccaacttc gcagagggca tcgctctttc agacccggtt gcaaaggaga  4081 gctgcatgct caacctgctg ctgtccctgc cggaggccaa cctgctcacc ttccttttcc  4141 ttctggacca cctgaaaagg gtggcagaga aggaggcagt caataagatg tccctgcaca  4201 acctcgccac ggtctttggc cccacgctgc tccggccctc cgagaaggag agcaagctcc  4261 ctgccaaccc cagccagcct atcaccatga ctgacagctg gtccttggag gtcatgtccc  4321 aggtccaggt gctgctgtac ttcctgcagc tggaggccat ccctgccccg gacagcaaga  4381 gacagagcat cctgttctcc accgaagtct aaaggtccca gtccatctcc tggaggcgga  4441 cagatggcct ggaaacctct ggctaatcgg gccatccgta gagcgggaac cttcctgagg  4501 tgtccttggg ccacccccaa gtgttgggcc atctgccaag agacagcgac ccaaagccga  4561 aggacaggtg gcctggaaag atcccgccca ggtctgggag ccccaggctg gcctcagact  4621 gtggtttttt atgtggccac ctgagggcgc cccaagccag ttcatctcgg agtccaggcc  4681 tggccctggg agacagggtg aagggagtgg tttttatgaa cttaacttag agtctaaaag  4741 atttctactg gatcacttgt caagatgcgc cctctctggg gagaagggaa cgtgactgga  4801 ttccctcact gttgtatctt gaataaacgc tgctgcttca tcctgtgggg gccgtggccc  4861 tgtccctgtg tgggtggggc ctcttccatt tccctgactt agaaaccaca ctccacttct  4921 aacagggttt gagaggctta gtcagcactg ggtagcgttt tgactccatt cttggctttc  4981 tttttctttc cagaaggatt tttgtgcaga aatgggtctt ttgttgccat gttagtcctc  5041 cttggaaggc agctcagaag gcctgtgaaa tgtcagggga caggaccccc agggagggaa  5101 ccccaggcta cgcactttag ggttcgttct ccagggagag cgacctcgtc ccccgatcct  5161 gaccgccctt ccggcccacg ctctcctgtt tggcttccac aggcctggac ttctctggct  5221 tctctgccca cacactccct gcccccagtg tccctgcccc tgccccagca caggtgactt  5281 catttctgtc ctctcagctc agtggactcg ctcaactttt gtataagtct ccacttggtg  5341 gcagcagctt gctgatgact tgttttaaaa ctttcatcct aaataacctt ttgatacttg  5401 aatatttgta agttttatac atagtttcta atttttttcc gaacagatcc agatacctaa  5461 taagatgctg gaatgtaatc cctggacaat ccgtgtcctg gcagcatttg gtcttcctct  5521 aagcgcctgg ctccgctgtt ctcaggagtg ggttctgaag tctctggaga acaggatacg  5581 tggagggtta ggaaggggcc aggcctagag acgggagact ccctcccgga gcaggtggag  5641 gcacaggacc attcgctacc ccatctgccg acacctgcgg gggagcccag gcattctttg  5701 taaaccctcc tgaccacctg gctcaaagaa aacagaagca tggagaccgc caagtatttt  5761 caagaaataa ccccatgaat attccatcac ttttttagaa agaggggctt ggggcaggca  5821 gaggagagaa gggagagcaa actgagagcc aagtttccac acggtcctgc aggaggagag  5881 gatgcagctg cccagaggga agcaggatca catttaagga agtgtgtggg gtccctggat  5941 gacaccagca cccagtgcgg ctctgtctgg cacccgctcc caaggtggga ggagtgggtg  6001 tcccctgtgt gtcagtgggc agctcctgct gaacccgcag ctcactaggg agcctgacag  6061 tggggccatg cgcctgacac tcctctctgc ttgtggacct ggcaaggcag ggagcagaaa  6121 acagccactt gaaggctttc tgtctgcgtc tgtgtgcagt gtggatttag ttgtgctttt  6181 ttcttgctgg gagagcacag ccaccattta caagcagtgt caccgtcgtg ggtggcgagg  6241 acagaacagg agcctctgct ctctgtacct atctgggccc ggtgggctcc cttgtcctgg  6301 cttccatctc tgtctcagcg accattcagc cctgcgcagg aacacgtgtt gcttagaaaa  6361 gccaaatcca gccttgtctc tgcctcctct ggtctcatga tgtgcatctg ttaccttgaa  6421 actggaaacc agtctatcaa tgtctgtgcc aattttttat tccctcccca acctccttcc  6481 ccatacgact ttttatttat gtaggatgtg tgctgtctaa tgatgggatg accacacttt  6541 tccatgttct aaaagtgctc ctctcccgca gggtcccagg gctggtggtt gctttgggtc  6601 tacagctacg tcttacccac ctcctgcctc aacagcctgt gtggtggcaa agccggtgtg  6661 gggctgggga acgcagcgtt ctccaggagg gggacctggc tctccttctg caatgcaggc  6721 gaaggcctag atgccagtgt gacctcccac aaggcgtggc ttccagactc cccggccgga  6781 agtgatgctt ttttgccttg ggccctgggt ttgaagcagc ctggctttct cttggtaagt  6841 ggctggtgtc ttagcagctg caatctgagc tcagccacct acacaccacc gtggccgaca  6901 ctttcattaa aaagtttcct gagacga |
| Green highlighted sequence = sequence in exon 12 (3123 – 3198)  Blue highlighted sequence = sequence in exon 13 (3199 – 3303)  Grey highlighted sequence = sequence in exon 14 (3304 – 3378) | Green highlighted sequence = sequence in exon 1 (1 – 1875)  Blue highlighted sequence = sequence in exon 2 (1876 – 2057) |
| Yellow highlighted sequence = the sequence (in-frame exon) that is lacking in variant 2   1. = used in first run; **(2)** = used in second run   ***Italic*** = different nucleotide sequence was used in the study; ***~~Italic~~*** = nucleotide sequence was not used in the study  t, c, a, g = single nucleotide variant (**t, c, a, g** if frequency ≥1% (based on ExAC MAF)); x = nucleotides with insertion / deletion polymorphism [retrieved 18th - 28th November 2018 from NCBI <https://www.ncbi.nlm.nih.gov/variation/view/?q=BCR&filters=source%3Adbsnp&assm=GCF_000001405.26>.  Location of nucleotides in transcript in reference to coding DNA was cross-checked (done for transcript nucleotide 597 and onwards) on 18th November 2018 from NCBI  https://www.ncbi.nlm.nih.gov/projects/SNP/snp_ref.cgi?geneId=613] | |

Supplementary Figure 1. BCR primer sequence used in the studies for (a) M-BCR, (b) m-BCR, in reference to the *BCR* sequence transcript variant 1 NM_004327.3 (retrieved 12th May 2018 from NCBI <https://www.ncbi.nlm.nih.gov/nuccore/NM_004327.3?report=genbank&to=6927>)
